# Supplementary material for: Mesostructure-controlled synthesis of chiral norbornane-bridged periodic mesoporous organosilicas
Source: Royal Society of Chemistry journal article supplement (doi:10.1039/c2ra00805j), 2012-01-01
Supplement: c2ra00805j.pdf [file c2ra00805j.pdf]

[*Supporting Information*]

**Mesostructure-controlled synthesis of chiral  
norbornane-bridged periodic mesoporous organosilicas**

**Ting Ting Hao,<sup>a</sup> Jiao Yi Shi,<sup>a</sup> Ting Yan Zhuang,<sup>b</sup> Wei David Wang,<sup>a</sup> Fu Chong Li,<sup>a</sup>  
and Wei Wang<sup>a\*</sup>**

<sup>a</sup>*State Key Laboratory of Applied Organic Chemistry, College of Chemistry and Chemical  
Engineering, Lanzhou University, Lanzhou, Gansu, 730000, P. R. China.  
E-mail: wang\_wei@lzu.edu.cn; Fax: +86 931 8915557; Tel: +86 931 8912282*

<sup>b</sup>*Center Testing International (Shenzhen) Corporation, Building C, Hongwei Industrial  
Park, Bao'an 70 District, Shenzhen, Guangdong, 518101, P. R. China.*

- A.** Influence of the reaction conditions (stirring, standing and aging time) on the mesostructure-control of chiral PMO materials
- B.** <sup>13</sup>C CP/MAS and <sup>29</sup>Si MAS NMR spectra of the cubic *Fm3m*-type chiral PMO material

### A. Influence of the reaction conditions (stirring, standing and aging time) on the mesostructure-control of chiral PMO materials

*Chiral PMO synthesized in the presence of F127, with the change of stirring time and without keeping the suspension in static conditions.* In a typical synthesis, 0.25 g of F127 was dissolved in 11 mL of deionised water and 0.3 mL of 2.0 M HCl. Afterwards, 0.59 g of the chiral precursor **1** was added to the solution and stirred at 40 °C for a few hours (a = 1 h, b = 2.5 h), then the suspension was directly aged at 100 °C for 24 h in a closed PTFE autoclave. After filtration and washing thoroughly with water a white powder was obtained.

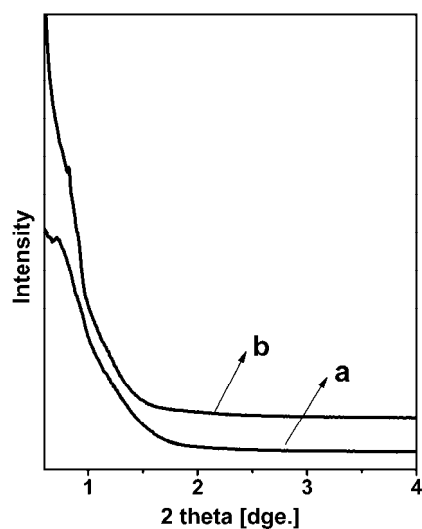

**Fig. S1** Powder XRD patterns of chiral PMO materials synthesized with stirring time of (a) 1 h and (b) 2.5 h, using F127 as the template. The suspension was then, without keeping in static conditions, directly aged at 100 °C for 24 h.

*Chiral PMO synthesized using co-surfactant directing agent (P123 and C<sub>14-6-14</sub>) under different synthetic conditions.* In a typical synthesis, 0.15 g of P123 and 0.02 g of C<sub>14-6-14</sub> was dissolved in 5 mL of deionised water and 0.15 mL of concentrated HCl. Afterwards, 0.25 g of the chiral precursor **1** was added to the solution and stirred at 40 °C for 24 h, then kept for another several hours (a = 24 h, b = 0 h, c = 24 h) under static conditions. Finally, the suspension was aged at 100 °C (a = 24 h, b = 24 h, c = 0 h) in a closed PTFE autoclave. After filtration and washing thoroughly with water a white powder was obtained.

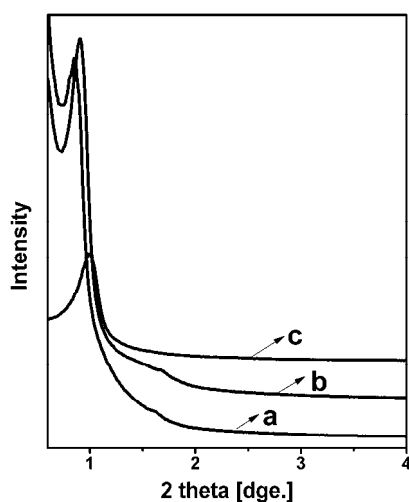

**Fig. S2** Powder XRD patterns of chiral PMO materials synthesized using co-surfactant direct agent (P123 and C<sub>14-6-14</sub>) under different synthetic conditions: (a) standard, (b) without keeping the solution in static conditions, (c) without aging.

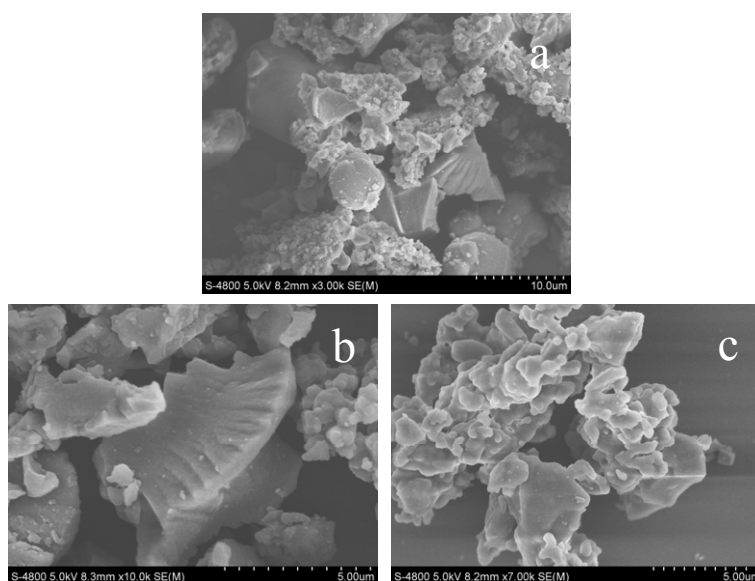

**Fig. S3** SEM images of chiral PMO materials synthesized using co-surfactant direct agent (P123 and C<sub>14-6-14</sub>) under different synthetic conditions: (a) standard, (b) without keeping the solution in static conditions, (c) without aging.

B.  $^{13}\text{C}$  CP/MAS and  $^{29}\text{Si}$  MAS NMR spectra of the cubic  $Fm\bar{3}m$ -type chiral PMO material

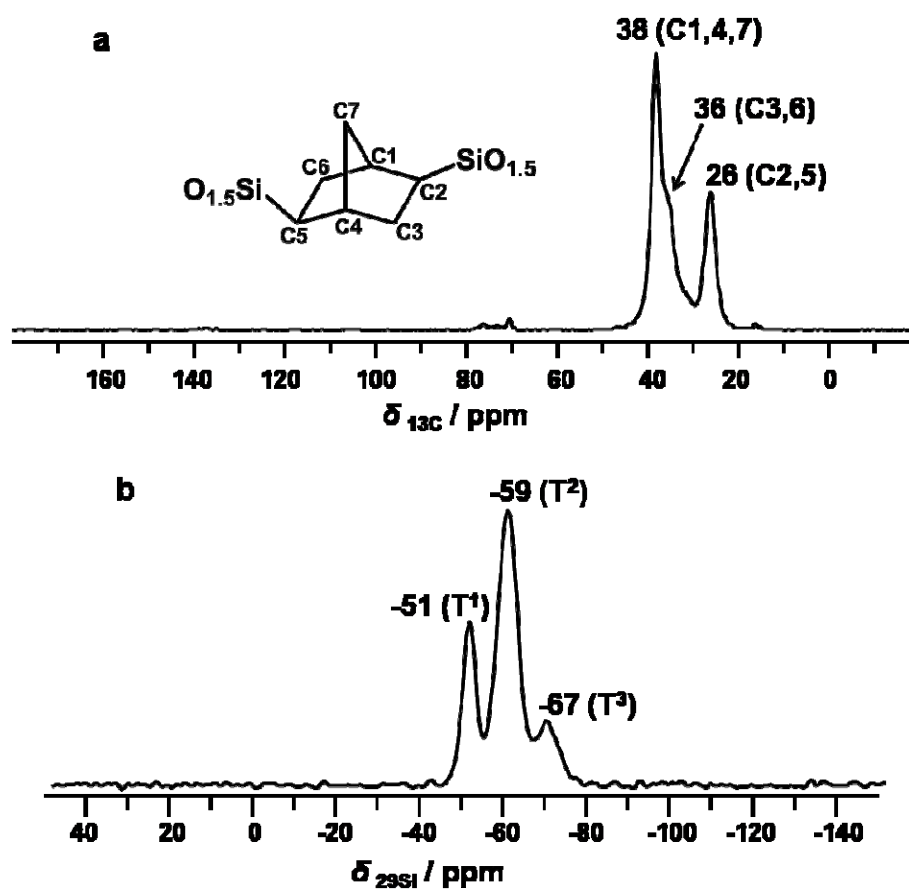

Fig. S4  $^{13}\text{C}$  CP/MAS (a) and  $^{29}\text{Si}$  MAS (b) NMR spectra of the 3D cubic  $Fm\bar{3}m$ -type chiral PMO material synthesized with the co-structure directing agent of P123 and C<sub>14-6-14</sub>.
